# Supplementary material
Source: PubMed Central journal article supplement (PMC5497793)
Supplement: NIHMS870302-supplement-001443_-_Supplemental_Material.pdf [file NIHMS870302-supplement-001443_-_Supplemental_Material.pdf]

Supplemental Material

Figure S1

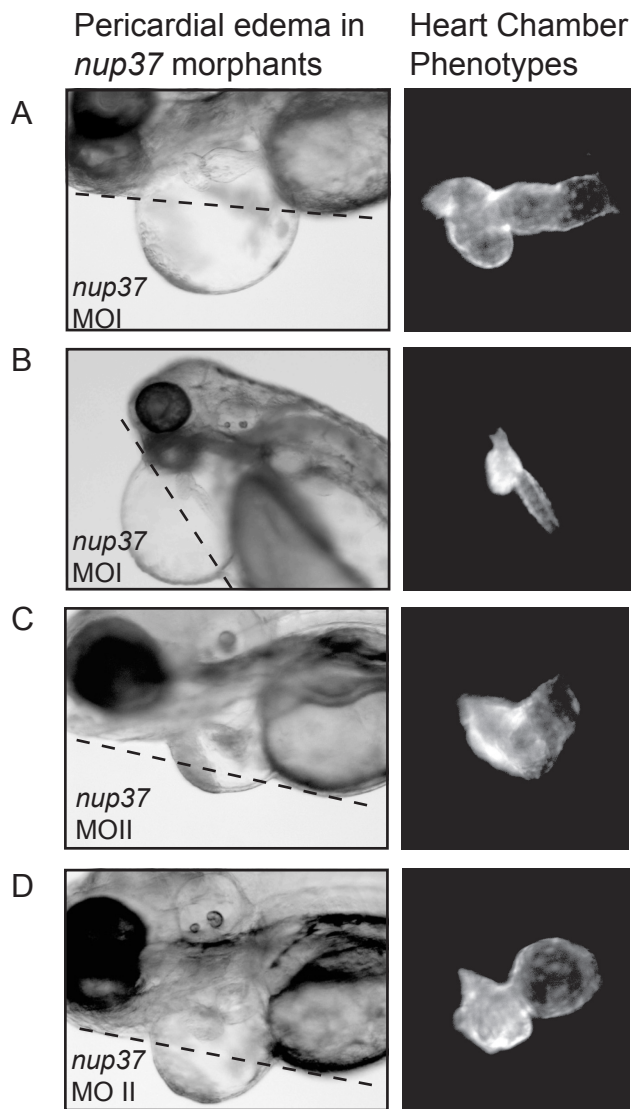

Figure S2

Examples of Pericardial Edema and Tail Phenotypes in *syne1b* morphants

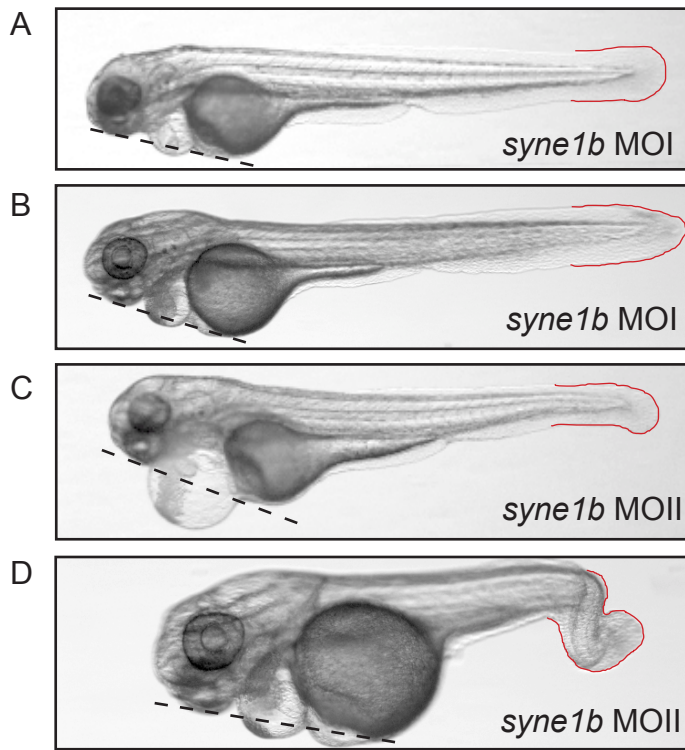

Examples of Heart Chamber morphology in *syne1b* morphants

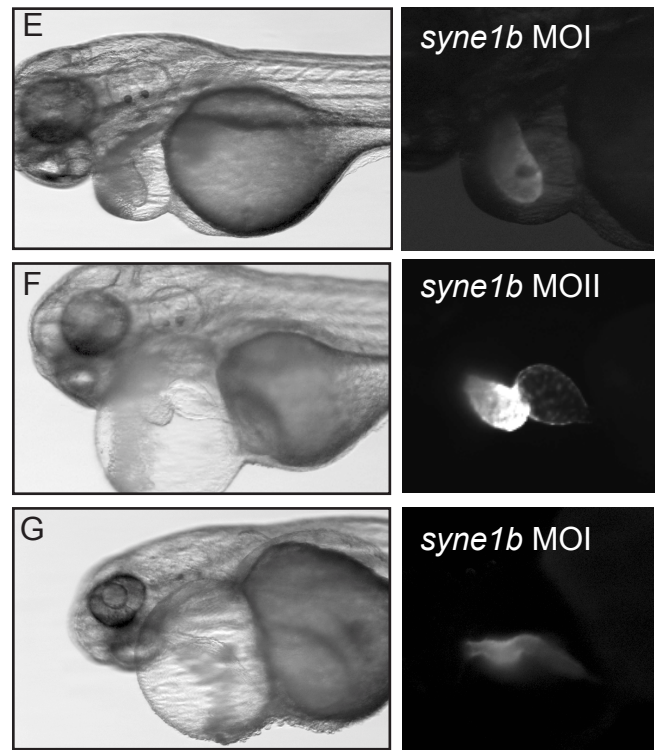

**Table S1: Genes on CVD Diagnostic Lists**

| Gene    | Description                                                    | Arrhythmia Dx List | Cardiomyopathy Dx List | MVP / TAA Dx List |
|---------|----------------------------------------------------------------|--------------------|------------------------|-------------------|
| ABCC9   | ATP-binding cassette sub-family C member 9                     | 1                  | 1                      |                   |
| ACADS   | Short-chain specific acyl-CoA dehydrogenase, mitochondrial     |                    | 1                      |                   |
| ACADVL  | Very long-chain specific acyl-CoA dehydrogenase, mitochondrial |                    | 1                      |                   |
| ACTA2   | Actin, aortic smooth muscle                                    |                    |                        | 1                 |
| ACTC1   | Actin, alpha cardiac muscle 1                                  |                    | 1                      |                   |
| ACTN2   | Alpha-actinin-2                                                |                    | 1                      |                   |
| AGK     | Acylglycerol kinase, mitochondrial                             |                    | 1                      |                   |
| AGL     | Glycogen debranching enzyme                                    |                    | 1                      |                   |
| AKAP9   | A-kinase anchor protein 9                                      | 1                  |                        |                   |
| ALMS1   | Alstrom syndrome protein 1                                     |                    | 1                      |                   |
| ANK2    | Ankyrin-2                                                      | 1                  |                        |                   |
| ANKRD1  | Ankyrin repeat domain-containing protein 1                     |                    | 1                      |                   |
| APOA1   | Apolipoprotein A-I                                             |                    | 1                      |                   |
| ARSB    | Arylsulfatase B                                                |                    | 1                      |                   |
| BAG3    | BAG family molecular chaperone regulator 3                     |                    | 1                      |                   |
| CACNA1C | Voltage-dependent L-type calcium channel subunit alpha-1C      | 1                  |                        |                   |
| CACNB2  | Voltage-dependent L-type calcium channel subunit beta-2        | 1                  |                        |                   |
| CASQ2   | Calsequestrin-2                                                | 1                  | 1                      |                   |
| CAV3    | Caveolin-3                                                     | 1                  | 1                      |                   |

|         |                                                               |   |   |   |
|---------|---------------------------------------------------------------|---|---|---|
| CBS     | Cystathionine beta-synthase                                   |   |   | 1 |
| COL3A1  | Collagen alpha-1(III) chain                                   |   |   | 1 |
| CRYAB   | Alpha-crystallin B chain                                      |   | 1 |   |
| CSRP3   | Cysteine and glycine-rich protein 3                           |   | 1 |   |
| CTF1    | Cardiotrophin-1                                               |   | 1 |   |
| DES     | Desmin                                                        |   | 1 |   |
| DMD     | Dystrophin                                                    |   | 1 |   |
| DNAJC19 | Mitochondrial import inner membrane translocase subunit TIM14 |   | 1 |   |
| DSC2    | Desmocollin-2                                                 | 1 | 1 |   |
| DSG2    | Desmoglein-2                                                  | 1 | 1 |   |
| DSP     | Desmoplakin                                                   | 1 | 1 |   |
| DTNA    | Dystrobrevin alpha                                            |   | 1 |   |
| EMD     | Emerin                                                        |   | 1 |   |
| EYA4    | Eyes absent homolog 4                                         |   | 1 |   |
| FBN1    | Fibrillin-1                                                   |   |   | 1 |
| FBN2    | Fibrillin-2                                                   |   |   | 1 |
| FHL2    | Four and a half LIM domains protein 2                         |   | 1 |   |
| FKTN    | Fukutin                                                       |   | 1 |   |
| GAA     | Lysosomal alpha-glucosidase                                   |   | 1 |   |
| GBE1    | 1,4-alpha-glucan-branching enzyme                             |   | 1 |   |
| GJA5    | Gap junction alpha-5 protein                                  | 1 |   |   |
| GLA     | Alpha-galactosidase A                                         |   | 1 |   |
| GLB1    | Beta-galactosidase                                            |   | 1 |   |
| GNPTAB  | N-acetylglucosamine-1-phosphotransferase subunits alpha/beta  |   | 1 |   |
| GPD1L   | Glycerol-3-phosphate dehydrogenase 1-like protein             | 1 |   |   |

|        |                                                        |   |   |   |   |
|--------|--------------------------------------------------------|---|---|---|---|
| GYS1   | Glycogen [starch] synthase, muscle                     |   |   | 1 |   |
| HFE2   | Hemojuvelin                                            |   |   | 1 |   |
| HRAS   | GTPase Hras                                            |   |   | 1 |   |
| JUP    | Junction plakoglobin                                   | 1 | 1 |   |   |
| KCNA5  | Potassium voltage-gated channel subfamily A member 5   |   | 1 |   |   |
| KCNE1  | Potassium voltage-gated channel subfamily E member 1   |   |   |   |   |
| KCNE2  | Potassium voltage-gated channel subfamily E member 2   |   | 1 |   |   |
| KCNE3  | Potassium voltage-gated channel subfamily E member 3   |   | 1 |   |   |
| KCNH2  | Potassium voltage-gated channel subfamily H member 2   |   | 1 |   |   |
| KCNJ2  | Inward rectifier potassium channel 2                   |   | 1 |   |   |
| KCNQ1  | Potassium voltage-gated channel subfamily KQT member 1 |   | 1 |   |   |
| LAMA4  | Laminin subunit alpha-4                                |   |   | 1 |   |
| LAMP2  | Lysosome-associated membrane glycoprotein 2            |   | 1 | 1 |   |
| LDB3   | LIM domain-binding protein 3                           |   |   | 1 |   |
| LMNA   | Prelamin-A/C                                           |   |   | 1 |   |
| MYBPC3 | Myosin-binding protein C, cardiac-type                 |   |   | 1 |   |
| MYH11  | Myosin-11                                              |   |   |   | 1 |
| MYH6   | Myosin-6                                               |   |   | 1 |   |
| MYH7   | Myosin-7                                               |   |   | 1 |   |

|         |                                                                     |   |  |   |   |
|---------|---------------------------------------------------------------------|---|--|---|---|
| MYL2    | Myosin regulatory light chain 2, ventricular/cardiac muscle isoform |   |  | 1 |   |
| MYL3    | Myosin light chain 3                                                |   |  | 1 |   |
| MYLK    | Myosin light chain kinase, smooth muscle                            |   |  |   | 1 |
| MYLK2   | Myosin light chain kinase 2, skeletal/cardiac muscle                |   |  | 1 |   |
| MYOZ2   | Myozenin-2                                                          |   |  | 1 |   |
| MYPN    | Myopalladin                                                         |   |  | 1 |   |
| NEXN    | Nexilin                                                             |   |  | 1 |   |
| NPPA    | Natriuretic peptides A                                              | 1 |  |   |   |
| PKP2    | Plakophilin-2                                                       | 1 |  | 1 |   |
| PLN     | Cardiac phospholamban                                               |   |  | 1 |   |
| PRKAG2  | 5'-AMP-activated protein kinase subunit gamma-2                     |   |  | 1 |   |
| PSEN1   | Presenilin-1                                                        |   |  | 1 |   |
| PSEN2   | Presenilin-2                                                        |   |  | 1 |   |
| RBM20   | RNA-binding protein 20                                              |   |  | 1 |   |
| RYR2    | Ryanodine receptor 2                                                | 1 |  | 1 |   |
| SCN1B   | Sodium channel subunit beta-1                                       | 1 |  |   |   |
| SCN3B   | Sodium channel subunit beta-3                                       | 1 |  |   |   |
| SCN4B   | Sodium channel subunit beta-4;SCN4B                                 | 1 |  |   |   |
| SCN5A   | Sodium channel protein type 5 subunit alpha                         | 1 |  | 1 |   |
| SGCD    | Delta-sarcoglycan                                                   |   |  | 1 |   |
| SLC22A5 | Solute carrier family 22 member 5                                   |   |  | 1 |   |

|          |                                                                    |   |   |   |
|----------|--------------------------------------------------------------------|---|---|---|
| SLC25A20 | Mitochondrial carnitine/acylcarnitine carrier protein              |   | 1 |   |
| SLC25A4  | ADP/ATP translocase 1                                              |   | 1 |   |
| SLC2A10  | Solute carrier family 2, facilitated glucose transporter member 10 |   |   | 1 |
| SMAD3    | Mothers against decapentaplegic homolog 3                          |   |   | 1 |
| SNTA1    | Alpha-1-syntrophin                                                 | 1 |   |   |
| TAZ      | Tafazzin                                                           |   | 1 |   |
| TCAP     | Telethonin                                                         |   | 1 |   |
| TGFB2    | Transforming growth factor beta-2                                  |   |   | 1 |
| TGFB3    | Transforming growth factor beta-3                                  | 1 | 1 | 1 |
| TGFBR1   | TGF-beta receptor type-1                                           |   |   | 1 |
| TGFBR2   | TGF-beta receptor type-2                                           |   |   | 1 |
| TMEM43   | Transmembrane protein 43                                           | 1 | 1 |   |
| TMPO     | Lamina-associated polypeptide 2, isoform alpha                     |   | 1 |   |
| TNNC1    | Troponin C, slow skeletal and cardiac muscles                      |   | 1 |   |
| TNNI3    | Troponin I, cardiac muscle                                         |   | 1 |   |
| TNNT2    | Troponin T, cardiac muscle                                         |   | 1 |   |
| TPM1     | Tropomyosin alpha-1 chain                                          |   | 1 |   |
| TTN      | Titin                                                              |   | 1 |   |
| TTR      | Transthyretin                                                      |   | 1 |   |
| VCL      | Vinculin                                                           |   | 1 |   |



Table S2: Patients, Phenotypes, and Results Returned

| Case                  | Phenotype                            | Age | Sex | Ethnicity | Dx Lists Run             | Dx List Results                             | Variants returned                                                                                                                  | Previous genetic testing |
|-----------------------|--------------------------------------|-----|-----|-----------|--------------------------|---------------------------------------------|------------------------------------------------------------------------------------------------------------------------------------|--------------------------|
| <b>Arrhythmia</b>     |                                      |     |     |           |                          |                                             |                                                                                                                                    |                          |
| NCG_00096             | Afib; suspected short QT syndrome    | 22  | M   | AA        | Arrhythmia<br>CM         | Neg<br>Neg                                  | none                                                                                                                               | none                     |
| NCG_00334             | LQT                                  | 60  | F   | Caucasian | Arrhythmia               | Neg                                         | none                                                                                                                               | none                     |
| NCG_00345             | LQT                                  | 25  | F   | AA        | Arrhythmia               | Pos                                         | KCNH2: NM_000238.3:c.2927delA,<br>NP_000229.1:p.Asp976fs (LP)                                                                      | none                     |
| NCG_00574             | DCM; LQT                             | 50  | F   | AA        | Arrhythmia<br>CM         | Uncertain<br>Uncertain                      | SCN5A: NM_198056.2:c.86C>T,<br>NP_932173.1:p.Ala29Val (VUS)                                                                        | none                     |
| NCG_00680             | HCM; LQT; Afib                       | 75  | F   | Caucasian | CM<br>Arrhythmia         | Pos<br>Uncertain<br>significance            | MYH7: NM_000257.2:c.1750G>A,<br>NP_000248.2:p.Gly584Ser (LP)<br><br>KCNH2: NM_000238.3:c.1039C>T,<br>NP_000229.1:p.Pro347Ser (VUS) | none                     |
| NCG_00682             | HCM; Afib                            | 59  | M   | Caucasian | CM<br>Arrhythmia         | Pos<br>Neg                                  | MYBPC3: NM_000256.3:c.1624G>C,<br>NP_000247.2:p.Glu542Gln (KP)                                                                     | none                     |
| NCG_00683             | HCM; LQT; rheumatic valvular disease | 63  | F   | Caucasian | CM<br>Arrhythmia<br>TAAD | Neg<br>Neg<br>Neg                           | none                                                                                                                               | none                     |
| NCG_00804             | DCM; history of sustained VT         | 63  | M   | AA        | CM<br>Arrhythmia         | Uncertain<br>Neg                            | TTN: NM_001267550.1:c.92677A>G<br>NP_001254479.1:p.Lys30893Glu (VUS)                                                               | none                     |
| <b>Cardiomyopathy</b> |                                      |     |     |           |                          |                                             |                                                                                                                                    |                          |
| NCG_00017             | DCM; HF                              | 37  | M   | AA        | CM                       | Uncertain;<br>2 variants<br>found in<br>DCM | ACTN2: NM_001103.2:c.2323C>T,<br>NP_001094.1:p.His775Tyr (VUS)<br><br>ACTN2: NM_001103.2:c.2567C>T,                                | none                     |

|           |                              |    |   |           |    | disease gene | NP_001094.1:p.Pro856Leu (VUS)                                                                                                                                                                                                            |                 |
|-----------|------------------------------|----|---|-----------|----|--------------|------------------------------------------------------------------------------------------------------------------------------------------------------------------------------------------------------------------------------------------|-----------------|
| NCG_00020 | DCM; HF                      | 49 | M | AA        | CM | Neg          | none                                                                                                                                                                                                                                     | none            |
| NCG_00024 | DCM (giant cell myocarditis) | 18 | M | AA        | CM | Neg          | none                                                                                                                                                                                                                                     | GeneDx negative |
| NCG_00061 | HCM                          | 42 | M | Caucasian | CM | Uncertain    | CSRP3: NM_003476.4:c.10T>C, NP_003467.1:p.Trp4Arg (VUS)                                                                                                                                                                                  | none            |
| NCG_00071 | DCM; HF                      | 66 | M | Caucasian | CM | Uncertain    | TTN: NM_001267550.1:c.102932C>G NP_001254479.1:p.Ser34311* (VUS)                                                                                                                                                                         | none            |
| NCG_00145 | DCM; HF                      | 49 | F | Caucasian | CM | Neg          | none                                                                                                                                                                                                                                     | none            |
| NCG_00208 | DCM; HF                      | 63 | F | AA        | CM | Uncertain    | TTN: NM_001267550.1:c.102523C>T, NP_001254479.1:p.Arg34175* (VUS)                                                                                                                                                                        | none            |
| NCG_00352 | DCM; HF                      | 58 | M | Caucasian | CM | Uncertain    | MY6: NM_002471.3:c.3428G>A, NP_002462.2:p.Arg1143Gln (VUS)                                                                                                                                                                               | none            |
| NCG_00362 | Early-onset CM; HF           | 23 | F | Caucasian | CM | Uncertain    | TNNT2: NM_000364.3:c.421C>T, NP_000355.2:p.Arg141Trp (VUS)                                                                                                                                                                               | none            |
| NCG_00370 | HCM                          | 29 | M | Caucasian | CM | Pos          | Homozygous DSG2:<br>NM_001943.3:c.674_678delTTACC,<br>NP_001934.2:p.Thr226fs (LP)<br><br>LAMA4: NM_001105206.2:c.4583G>A,<br>NP_001098676.2:p.Arg1528His (VUS)<br><br>LDB3: NM_001080114.1:c.331A>G,<br>NP_001073583.1:p.Asn111Asp (VUS) | none            |
| NCG_00522 | DCM                          | 40 | M | Caucasian | CM | Pos          | BAG3: NM_004281.3:c.946C>T, NP_004272.2:p.Gln316*                                                                                                                                                                                        | none            |
| NCG_00534 | DCM                          | 37 | F | AA        | CM | Neg          | none                                                                                                                                                                                                                                     | none            |
| NCG_00536 | DCM                          | 37 | F | AA        | CM | Pos          | TTN:<br>NM_001267550.1:c.87295_87296insT,<br>NP_001254479.1:p.Asn29099fs                                                                                                                                                                 | none            |

|           |      |    |   |           |    |           |                                                                                                                                                                                                                               |      |
|-----------|------|----|---|-----------|----|-----------|-------------------------------------------------------------------------------------------------------------------------------------------------------------------------------------------------------------------------------|------|
| NCG_00537 | DCM  | 46 | M | AA        | CM | Uncertain | DSP: NM_004415.2:c.2683T>C,<br>NP_004406.2:p.Tyr895His                                                                                                                                                                        | none |
| NCG_00544 | DCM  | 50 | F | AA        | CM | Uncertain | MYH6: NM_002471.3:c.5095C>T,<br>NP_002462.2:p.Arg1699Trp                                                                                                                                                                      | none |
| NCG_00561 | LVNC | 47 | M | Caucasian | CM | Uncertain | TTN: NM_001267550.1:c.13058delC,<br>NP_001254479.1:p.Pro4353fs (VUS)<br><br>TTN: NM_001267550.1:c.23965C>T,<br>NP_001254479.1:p.Arg7989Cys (VUS)<br><br>TTN: NM_001267550.1:c.52139A>T,<br>NP_001254479.1:p.Asp17380Val (VUS) | none |
| NCG_00611 | DCM  | 26 | M | AA        | CM | Uncertain | VCL: NM_003373.3:c.1856C>T,<br>NP_003364.1:p.Ala619Val<br>NM_014000.2:c.1856C>T,<br>NP_054706.1:p.Ala619Val (VUS)                                                                                                             | none |
| NCG_00615 | DCM  | 26 | F | AA        | CM | Uncertain | TTN: NM_001267550.1:c.80338C>T,<br>NP_001254479.1:p.Pro26780Ser (VUS)                                                                                                                                                         | none |
| NCG_00632 | DCM  | 28 | M | Caucasian | CM | Pos       | TTN: NM_001267550.1:c.94855C>T,<br>NP_001254479.1:p.Arg31619* (LP)                                                                                                                                                            | none |
| NCG_00644 | DCM  | 41 | M | AA        | CM | Neg       | none                                                                                                                                                                                                                          | none |
| NCG_00645 | DCM  | 38 | F | AA        | CM | Neg       | none                                                                                                                                                                                                                          | none |
| NCG_00661 | DCM  | 60 | M | AA        | CM | Uncertain | MYPN: NM_032578.3:c.3583G>A,<br>NP_115967.2:p.Val1195Met (VUS)<br><br>TTN: NM_001267550.1:c.87623A>T,<br>NP_001254479.1:p.Tyr29208Phe (VUS)                                                                                   | none |
| NCG_00673 | DCM  | 47 | M | AA        | CM | Neg       | none                                                                                                                                                                                                                          | none |
| NCG_00678 | HCM  | 58 | F | AA        | CM | Uncertain | TTN: NM_001267550.1:c.93367G>C,<br>NP_001254479.1:p.Val31123Leu<br>(VUS)<br><br>TTN: NM_001267550.1:c.72181A>G,                                                                                                               | none |

|           |                                            |    |   |           |    |           |                                                                                                                                                             |      |
|-----------|--------------------------------------------|----|---|-----------|----|-----------|-------------------------------------------------------------------------------------------------------------------------------------------------------------|------|
|           |                                            |    |   |           |    |           | NP_001254479.1:p.Met24061Val (VUS)                                                                                                                          |      |
| NCG_00687 | HCM                                        | 60 | M | Caucasian | CM | Uncertain | MYL2: NM_000432.3:c.433G>A,<br>NP_000423.2:p.Asp145Asn (VUS)                                                                                                | none |
| NCG_00689 | HCM; mild LVH                              | 17 | M | Caucasian | CM | Pos       | MYBPC3: NM_000256.3:c.350delC,<br>NP_000247.2:p.Pro117fs (LP)                                                                                               | none |
| NCG_00700 | HCM with conduction system disease         | 23 | F | Caucasian | CM | Pos       | DES: NM_001927.3:c.1360C>T,<br>NP_001918.3:p.Arg454Trp (LP)                                                                                                 | none |
| NCG_00719 | early onset DCM                            | 29 | F | AA        | CM | Neg       | none                                                                                                                                                        | none |
| NCG_00732 | CM; carnitine deficiency                   | 10 | F | Caucasian | CM | Pos       | SLC22A5:<br>NM_003060.3:c.62_64delTCT,<br>NP_003051.1:p.Ile21_Phe22delinsIle (LP)<br><br>SLC22A5:<br>NM_003060.3:c.939T>A,<br>NP_003051.1:p.Phe313Leu (VUS) | none |
| NCG_00758 | DCM                                        | 45 | F | AA        | CM | Uncertain | TTN: NM_001267550.1:c.62467C>T,<br>NP_001254479.1:p.Arg20823Cys (VUS)                                                                                       | none |
| NCG_00759 | DCM                                        | 52 | M | AA        | CM | Neg       | none                                                                                                                                                        | none |
| NCG_00788 | ASH variant of HCM and adrenal myelolipoma | 56 | F | Caucasian | CM | Neg       | none                                                                                                                                                        | none |
| NCG_00805 | HCM                                        | 62 | F | AA        | CM | Uncertain | NEXN:<br>NM_144573.3:c.987_989delAGA,<br>NP_653174.3:p.Ala329_Glu330delinsAla (VUS)                                                                         | none |
| NCG_00838 | HCM                                        | 35 | M | Caucasian | CM | Pos       | MYBPC3: NM_000256.3:c.1624G>C,<br>NP_000247.2:p.Glu542Gln (KP)                                                                                              | none |

| Thoracic Aneurysm and Dissection |                                                      |    |   |           |      |           |                                                             |                                                    |
|----------------------------------|------------------------------------------------------|----|---|-----------|------|-----------|-------------------------------------------------------------|----------------------------------------------------|
| NCG_00099                        | Thoracic aortic aneurysm                             | 27 | F | Caucasian | TAAD | Neg       | none                                                        | Neg for: TGFBR1; MYH11; ACTA2; exons 1-7 of TGFBR2 |
| NCG_00157                        | Thoracic aortic aneurysm                             | 44 | M | Caucasian | TAAD | Uncertain | FBN2: NM_001999.3:c.4312G>A, NP_001990.2:p.Glu1438Lys (VUS) | Neg TGFBR1 and TGFBR2 sequencing                   |
| NCG_00261                        | MVP                                                  | 16 | F | Caucasian | TAAD | Neg       | none                                                        | none                                               |
| NCG_00354                        | MVP;TAA                                              | 59 | M | Caucasian | TAAD | Neg       | none                                                        | Neg for: COL3A1; FBN1                              |
| NCG_00435                        | Thoracic and Ascending Aortic Aneurysms              | 60 | F | Caucasian | TAAD | Neg       | none                                                        | none                                               |
| NCG_00484                        | Aortic dissection                                    | 75 | M | Caucasian | TAAD | Neg       | none                                                        | none                                               |
| NCG_00540                        | Bicuspid aortic valve and ascending aortic aneurysm  | 4  | F | Caucasian | TAAD | Neg       | none                                                        | none                                               |
| NCG_00721                        | Aortic aneurysm                                      | 43 | F | Caucasian | TAAD | Pos       | FBN1: NM_000138.4:c.3902G>T, NP_000129.3:p.Gly1301Val (LP)  | Unclear based on pt. report                        |
| NCG_00787                        | Near total occlusion of left internal carotid artery | 2  | M | Caucasian | TAAD | Neg       | none                                                        | none                                               |
| NCG_00865                        | MVP                                                  | 46 | M | Caucasian | TAAD | Neg       | none                                                        | Neg for: COL3A1; COL5A1;                           |

|           |                                 |    |   |           |      |     |      |        |
|-----------|---------------------------------|----|---|-----------|------|-----|------|--------|
|           |                                 |    |   |           |      |     |      | COL5A2 |
| NCG_00973 | TAAD,<br>Dilated aortic<br>root | 18 | F | AA        | TAAD | Neg | none | none   |
| NCG_00985 | TAAD                            | 56 | F | Caucasian | TAAD | Neg | none | none   |
| NCG_00998 | TAAD                            | 51 | M | Caucasian | TAAD | Neg | none | none   |

Abbreviations: Dx: Diagnostic; Afib: Atrial fibrillation; LQT: long QT; AA: African American; CM: cardiomyopathy; DCM: dilated cardiomyopathy; HCM: hypertrophic cardiomyopathy; TAAD: thoracic aneurysm and aortic dissection; MVP: mitral valve prolapse; HF: heart failure; VT: ventricular tachycardia; LVNC: left ventricular non-compaction; Neg: negative; Pos: positive. If a likely pathogenic (LP) or known pathogenic (KP) variant was identified, co-existing VUS that could not be excluded as benign in genes that fit the patient's phenotype were reported back to participants and discussed in a nuanced manner (like all VUS) as likely to be at best contributory, given the co-existence of a pathogenic variant.

Table S3: No Difference in Distribution or Number of Deleterious TTN MS variants in CVD cases vs. controls

| Location                                                                                          | AA start | AA end          | Cases CADD > 20 | Controls CADD > 20 | Cases CADD > 15 | Controls CADD > 15 | Cases CADD > 13 | Controls CADD > 13 | Cases CADD > 10 | Controls CADD > 10 | Totals (Cases) | Totals (Controls) |
|---------------------------------------------------------------------------------------------------|----------|-----------------|-----------------|--------------------|-----------------|--------------------|-----------------|--------------------|-----------------|--------------------|----------------|-------------------|
| Z-band                                                                                            | 1        | 831             | 1               | 4                  | 1               | 5                  | 1               | 5                  | 1               | 5                  | 1              | 5                 |
| Near-Z                                                                                            | 832      | 2169            | 0               | 2                  | 0               | 5                  | 0               | 6                  | 0               | 6                  | 0              | 6                 |
| I-band                                                                                            | 2170     | 15655           | 1               | 24                 | 4               | 38                 | 4               | 48                 | 5               | 55                 | 7              | 64                |
| A-band                                                                                            | 15656    | 33588           | 2               | 48                 | 7               | 80                 | 8               | 92                 | 9               | 99                 | 10             | 101               |
| M-band                                                                                            | 33589    | 35992           | 1               | 5                  | 2               | 6                  | 3               | 10                 | 3               | 10                 | 4              | 10                |
| <b>Expected Values for Chi-Square Goodness of Fit Test</b>                                        |          |                 |                 |                    |                 |                    |                 |                    |                 |                    |                |                   |
| No. of cases                                                                                      | 54       | <b>Expected</b> | 0.48            |                    | 0.60            |                    | 0.60            |                    | 0.60            |                    | 0.60           |                   |
| No. of controls                                                                                   | 451      |                 | 0.24            |                    | 0.60            |                    | 0.72            |                    | 0.72            |                    | 0.72           |                   |
|                                                                                                   |          |                 | 2.87            |                    | 4.54            |                    | 5.73            |                    | 6.57            |                    | 7.65           |                   |
|                                                                                                   |          |                 | 5.73            |                    | 9.56            |                    | 10.99           |                    | 11.83           |                    | 12.07          |                   |
|                                                                                                   |          |                 | 0.60            |                    | 0.72            |                    | 1.19            |                    | 1.19            |                    | 1.19           |                   |
| <b>Goodness of Fit Test p-values for each CADD score threshold (none are significant at 0.05)</b> |          |                 |                 |                    |                 |                    |                 |                    |                 |                    |                |                   |
| Chi-sq                                                                                            |          |                 | 0.32            |                    | 0.42            |                    | 0.28            |                    | 0.31            |                    | 0.09           |                   |

Table S4: Median percent of bases in CVD genes covered at <8x

|               |               |                |              |                |                |                |                |
|---------------|---------------|----------------|--------------|----------------|----------------|----------------|----------------|
| ABCC9<br>0    | ACADS<br>0    | ACADVL<br>0.44 | ACTA2<br>0   | ACTC1<br>0     | ACTN2<br>0     | AGK<br>0.57    | AGL<br>0       |
| ALMS1<br>.11  | ANK2<br>0.07  | ANKRD1<br>0    | APOA1<br>0   | ARSB<br>1.96   | BAG3<br>0      | CACNA1C<br>0.2 | AKAP9<br>0.55  |
| CACNB2<br>0   | CASQ2<br>0    | CAV3<br>0      | CBS<br>1.45  | COL3A1<br>1.23 | COL5A1<br>2.14 | CRYAB<br>0     | CSRP3<br>0     |
| CTF1<br>18.08 | DES<br>0      | DMD<br>0.07    | DNAJC19<br>0 | DSC2<br>0.22   | DSG2<br>0      | DSP<br>0.17    | DTNA<br>0      |
| EFEMP2<br>0   | ELN<br>0.07   | EMD<br>0       | EYA4<br>0    | FBN1<br>0      | FBN2<br>0.01   | FHL2<br>0      | FKTN<br>0.51   |
| FLNA<br>0.05  | GAA<br>0      | GBE1<br>0      | GJA5<br>0    | GLA<br>0.51    | GLB1<br>9.15   | GNPTAB<br>0    | GPD1L<br>0     |
| GYS1<br>4.16  | HAMP<br>0     | HFE2<br>0      | HRAS<br>0    | JUP<br>0.04    | KCNA5<br>0     | KCNE1<br>0     | KCNE2<br>0     |
| KCNE3<br>0    | KCNH2<br>4.6  | KCNJ2<br>0     | KCNQ1<br>6.7 | LAMA4<br>0     | LAMP2<br>7.69  | LDB3<br>3.18   | LMNA<br>5.51   |
| MED12<br>2.4  | MFAP5<br>0    | MYBPC3<br>1.18 | MYH11<br>0   | MYH6<br>4.64   | MYH7<br>4.06   | MYL2<br>0      | MYL3<br>0      |
| MYLK<br>0.3   | MYLK2<br>0    | MYOZ2<br>0     | MYPN<br>0    | NEXN<br>1.63   | NOTCH1<br>1.52 | NPPA<br>0      | PKP2<br>7.26   |
| PLN<br>2.02   | PRKAG2<br>0   | PRKG1<br>0     | PSEN1<br>0   | PSEN2<br>0     | RBM20<br>0.49  | RYR2<br>0.15   | SCN1B<br>3.47  |
| SCN3B<br>0    | SCN4B<br>3.35 | SCN5A<br>0     | SGCD<br>0    | SKI<br>1.42    | SLC22A5<br>0   | SLC25A20<br>0  | SLC25A<br>4    |
| SLC2A10<br>0  | SMAD3<br>0.31 | SNTA1<br>11.92 | TAZ<br>0     | TCAP<br>0      | TGFB2<br>0     | TGFB3<br>0     | TGFBR1<br>6.42 |
| TGFBR2<br>0   | TMEM43<br>0   | TMPO<br>0.86   | TNNC1<br>0   | TNNI3<br>0.16  | TNNT2<br>0     | TPM1<br>0      | TTN<br>2.11    |
| TTR<br>0      | VCL<br>0.79   |                |              |                |                |                |                |



Video S1: Optical video recording of heartbeat in Tg zebrafish injected with 7ng morpholino targeting znup37

Video S2: Optical video recording of heartbeat in zebrafish injected with 8ng morpholino targeting zsyne1b
